# Supplementary material for: Genomic Epidemiology and Serology Associated with a SARS-CoV-2 R.1 Variant Outbreak in New Jersey
Source: PubMed Central journal article supplement (PMC9600516; doi:10.1128/mbio.02141-22), 2022-08-23

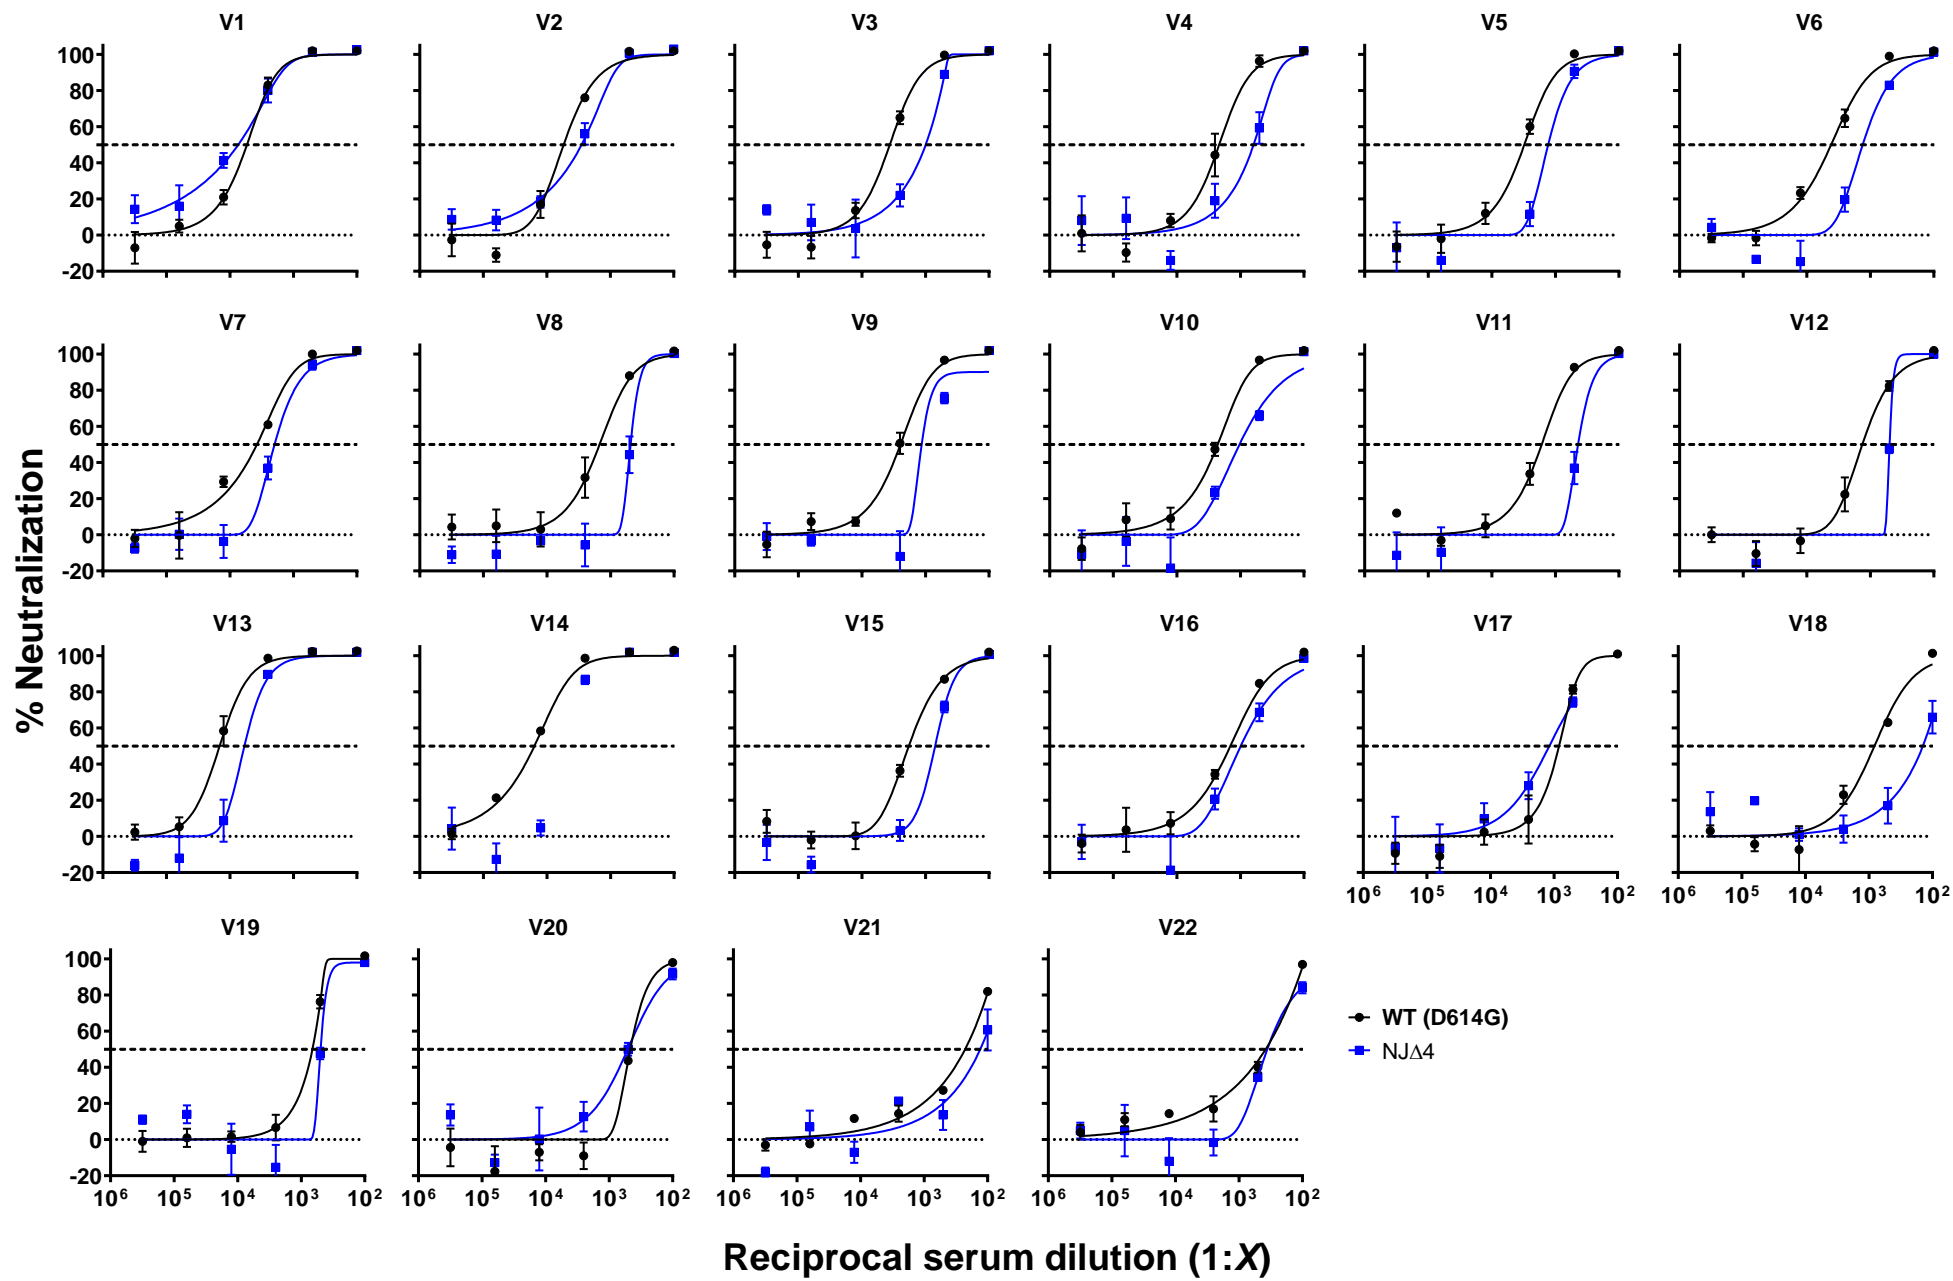

Supplement: mbio.02141-22-s0004.pdf [file mbio.02141-22-s0004.pdf]
